# Supplementary material
Source: Springer Nature journal article supplement (https://www.springermedizin.de/resource/supplementary/12879_2011_1925_MOESM1_ESM.pdf/9444022)
Supplement: MOESM1 [file 9444022]

**Supplementary Table 1. PubMed Search Strategy for Studies Related to RSV and Residential Crowding or Risk Factor Analysis**

| Search                                                      | Search Terms                                                                                                                                                                                                                                                                                                                            |
|-------------------------------------------------------------|-----------------------------------------------------------------------------------------------------------------------------------------------------------------------------------------------------------------------------------------------------------------------------------------------------------------------------------------|
| Disease MeSH Terms Limited by Subheadings and Keywords      |                                                                                                                                                                                                                                                                                                                                         |
| #1                                                          | "Respiratory Syncytial Virus Infections/complications"[Mesh] OR "Respiratory Syncytial Virus Infections/epidemiology"[Mesh] OR "Respiratory Syncytial Virus Infections/etiology"[Mesh]                                                                                                                                                  |
| #2                                                          | "Bronchiolitis, Viral/complications"[Mesh] OR "Bronchiolitis, Viral/epidemiology"[Mesh] OR "Bronchiolitis, Viral/etiology"[Mesh]                                                                                                                                                                                                        |
| #3                                                          | "Respiratory Tract Infections/complications"[Mesh] OR "Respiratory Tract Infections/epidemiology"[Mesh] OR "Respiratory Tract Infections/etiology"[Mesh]                                                                                                                                                                                |
| #4                                                          | #3 AND (syncytial OR RSV OR (acute AND lower))                                                                                                                                                                                                                                                                                          |
| #5                                                          | #1 or #2 or #4                                                                                                                                                                                                                                                                                                                          |
| Text Terms for Crowding                                     |                                                                                                                                                                                                                                                                                                                                         |
| #6                                                          | crowding[TEXT] or or resident [TEXT] or residents[TEXT] or "residential"[TEXT] or bedroom[TEXT] or bedrooms[TEXT] or household[TEXT] or households[TEXT] or "number of children"[TEXT] or "number of people"[TEXT] or "per room"[TEXT] or (> AND people) or sibling or siblings or sharing or share or "crowding"[MESH] or overcrowding |
| #7                                                          | #5 AND #6                                                                                                                                                                                                                                                                                                                               |
| Disease with Text Terms for Regression Analysis in Children |                                                                                                                                                                                                                                                                                                                                         |
| #8                                                          | #5 and (multivariate or multifactorial or regression) and (child or children or infant or infants)                                                                                                                                                                                                                                      |
| Combined Crowding and Analyses Searches                     |                                                                                                                                                                                                                                                                                                                                         |
| #9                                                          | #7 or #8                                                                                                                                                                                                                                                                                                                                |
| Inclusionary Limits                                         |                                                                                                                                                                                                                                                                                                                                         |
| #8                                                          | <b>Limits:</b> Humans, English, 1985 to present                                                                                                                                                                                                                                                                                         |
| Exclusionary Limits                                         |                                                                                                                                                                                                                                                                                                                                         |
| #9                                                          | <b>Publication Type:</b> Editorial, Letter, Case Reports, Comment, Legal Cases, Legislation, In Vitro, Phase I clinical trial                                                                                                                                                                                                           |
| Retained Titles/Abstracts                                   |                                                                                                                                                                                                                                                                                                                                         |
| #10                                                         | #8 NOT #9                                                                                                                                                                                                                                                                                                                               |

**Supplementary Table 2. Embase Search Strategy for Studies Related to RSV and Residential Crowding or Risk Factor Analysis**

| <b>Search</b>                                                 | <b>Search Terms</b>                                                                                                                                                                                                                                     |
|---------------------------------------------------------------|---------------------------------------------------------------------------------------------------------------------------------------------------------------------------------------------------------------------------------------------------------|
| <b>Disease Terms</b>                                          |                                                                                                                                                                                                                                                         |
| S1                                                            | (RESPIRATORY()SYNCYTIAL()VIRUS()INFECTION? OR RESPIRATORY()SYNCYTIAL()PNEUMOVIRUS()INFECTION? OR RESPIRATORY()SYNCYTIAL()PNEUMOVIRUS/DE) AND (VIRUS()INFECTION(L)COMPLICATION OR VIRUS()INFECTION(L)EPIDEMIOLOGY OR VIRUS()INFECTION(L)ETIOLOGY)        |
| S2                                                            | VIRAL()BRONCHIOLITIS(L)COMPLICATION OR VIRAL()BRONCHIOLITIS(L)EPIDEMIOLOGY OR VIRAL()BRONCHIOLITIS(L)ETIOLOGY                                                                                                                                           |
| S3                                                            | RESPIRATORY TRACT INFECTION!(L)COMPLICATION OR RESPIRATORY TRACT INFECTION!(L)EPIDEMIOLOGY OR RESPIRATORY TRACT INFECTION!(L)ETIOLOGY                                                                                                                   |
| S4                                                            | S3 AND (SYNCYTIAL OR RSV OR (ACUTE AND LOWER))                                                                                                                                                                                                          |
| S5                                                            | S1 OR S2 OR S4                                                                                                                                                                                                                                          |
| <b>Terms for Crowding</b>                                     |                                                                                                                                                                                                                                                         |
| S6                                                            | CROWDING OR RESIDENT OR RESIDENTS OR RESIDENTIAL OR BEDROOM OR BEDROOMS OR HOUSEHOLD OR HOUSEHOLDS OR NUMBER(1W)CHILDREN OR NUMBER(1W)PEOPLE OR PER()ROOM OR (">" AND PEOPLE) OR SIBLING OR SIBLINGS OR SHARING OR SHARE OR CROWDING/DE OR OVERCROWDING |
| S7                                                            | S5 AND S6                                                                                                                                                                                                                                               |
| <b>Disease with Terms for Regression Analysis in Children</b> |                                                                                                                                                                                                                                                         |
| S8                                                            | S5 AND (MULTIVARIATE OR MULTIFACTORIAL OR REGRESSION) AND (CHILD OR CHILDREN OR INFANT OR INFANTS)                                                                                                                                                      |
| <b>Combined Crowding and Analyses Searches</b>                |                                                                                                                                                                                                                                                         |
| S9                                                            | S7 OR S8                                                                                                                                                                                                                                                |
| <b>Inclusionary Limits</b>                                    |                                                                                                                                                                                                                                                         |
| S10                                                           | S9/HUMAN                                                                                                                                                                                                                                                |
| S11                                                           | S10/ENG                                                                                                                                                                                                                                                 |
| S12                                                           | S11/1985:2009                                                                                                                                                                                                                                           |
| <b>Exclusionary Limits</b>                                    |                                                                                                                                                                                                                                                         |
| S13                                                           | S12 NOT (DT=EDITORIAL OR DT=LETTER OR CASE()REPORT/DE OR COMMENT?/TI OR LEGAL()CASE? OR LAW/DE OR IN VITRO STUDY! OR PHASE()1()CLINICAL()TRIAL/DE)                                                                                                      |
| <b>Retained Titles/Abstracts</b>                              |                                                                                                                                                                                                                                                         |
| S14                                                           | RD S13 (unique items)                                                                                                                                                                                                                                   |
